# Supplementary material for: 3-Bromopyridine-Heterogenized Phosphotungstic Acid for Efficient Trimerization of Biomass-Derived 5-Hydroxymethylfurfural with 2-Methylfuran to C21 Fuel Precursor
Source: Hindawi journal article supplement (doi:10.1155/2020/6438490), 2020-08-06
Supplement: f1 [file 6438490.f1.docx]

**Supplementary Materials**

**3-Bromopyridine-heterogenized phosphotungstic acid for efficient trimerization of biomass-derived 5-hydroxymethylfurfural with 2-methylfuran to C21 fuel precursor**

Yufei Xu, Zhaozhuo Yu, Hu Li, Song Yang


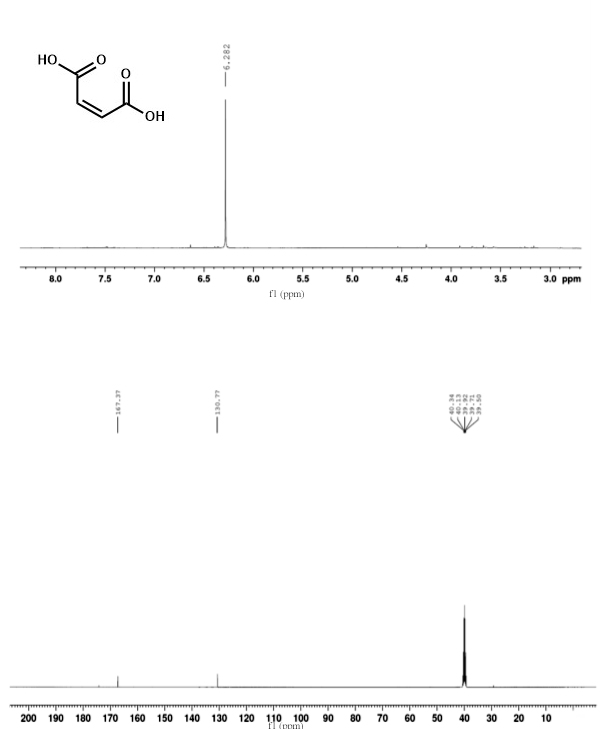


**FIGURE S1:** 1H and 13C NMR spectra of maleic acid.
